# Supplementary material
Source: Springer Nature journal article supplement (https://www.springermedizin.de/resource/supplementary/12936_2014_3213_MOESM4_ESM.pdf/9545334)

Glomerular area ( $\mu\text{m}^2$ )

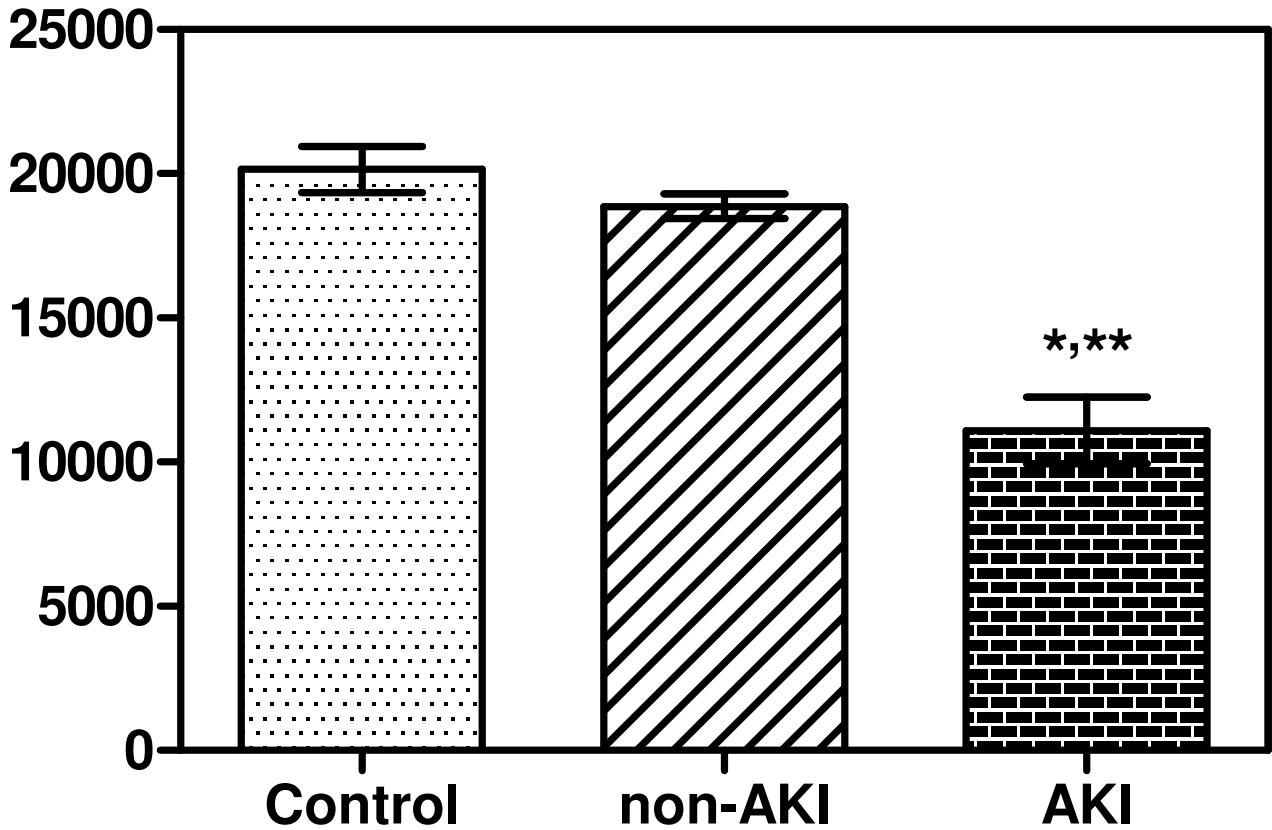

Supplement: MOESM4 [file 9545334]
